# Supplementary material
Source: Royal Society of Chemistry journal article supplement (doi:10.1039/d5nr04935k)

Electronic Supplementary Material (ESI) for Nanoscale.  
This journal is © The Royal Society of Chemistry 2025

**Original picture:**

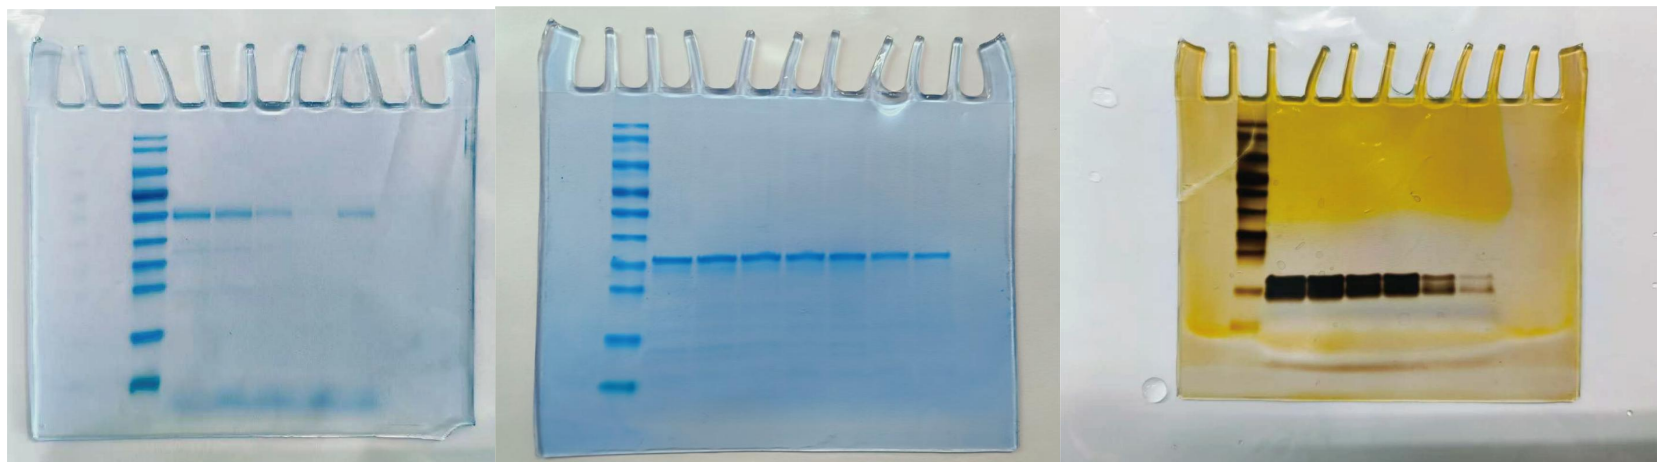

**Grayscale image:**

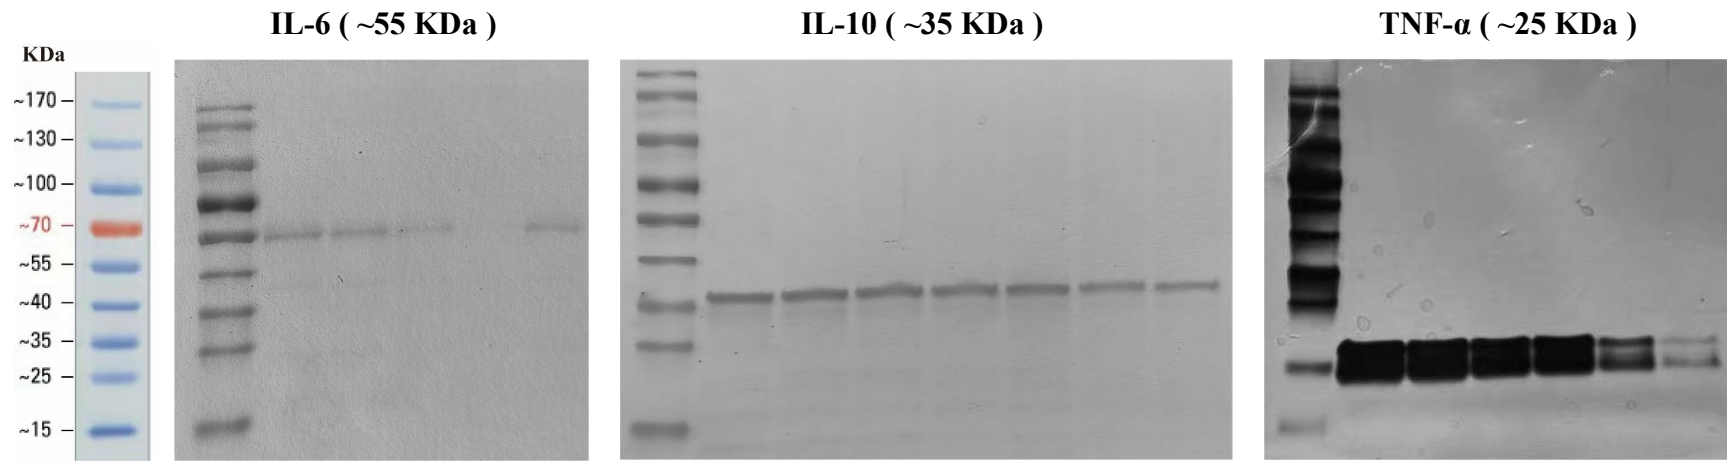

**Grayscale image with labeling:**

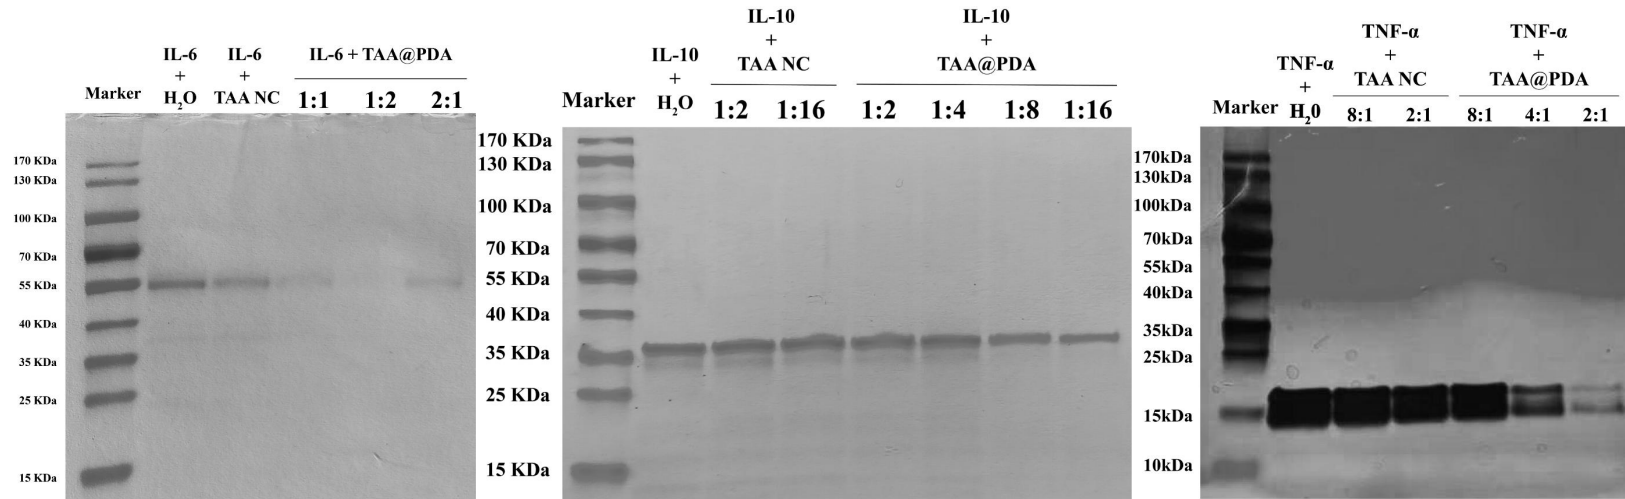

The final results (Perform grayscale value analysis on protein bands using ImageJ):

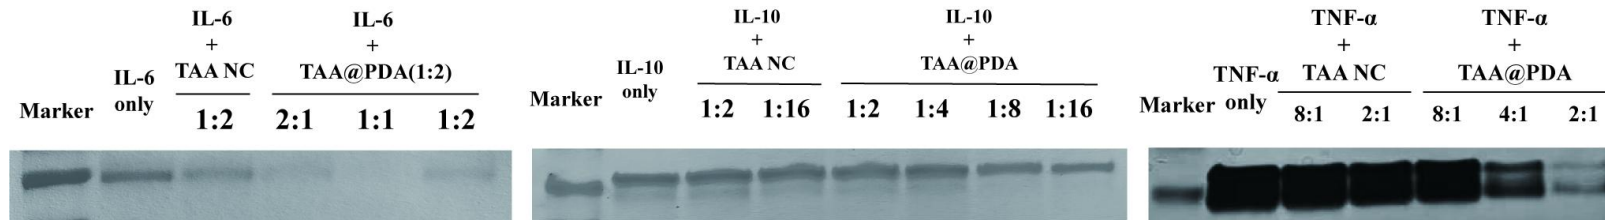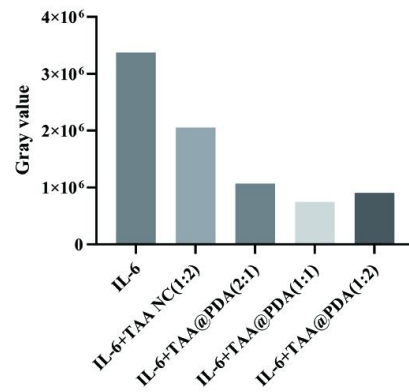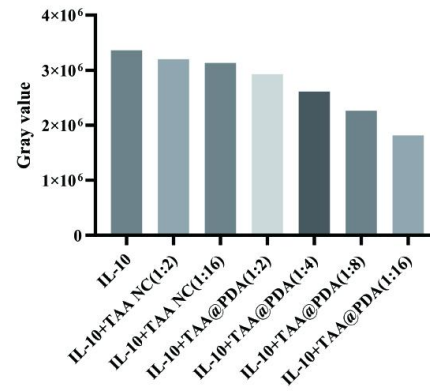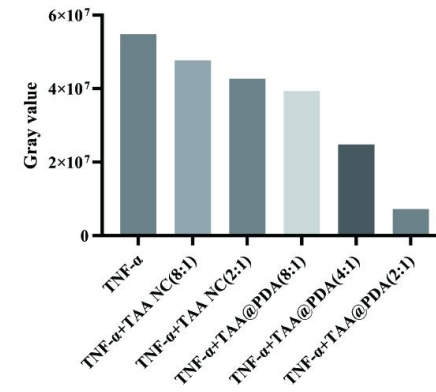

Supplement: d5nr04935k1.pdf [file d5nr04935k1.pdf]
