# Supplementary material
Source: Royal Society of Chemistry journal article supplement (doi:10.1039/d5nr04935k)
Supplement: d5nr04935k3.pdf [file d5nr04935k3.pdf]

View001

JEOL 1/1

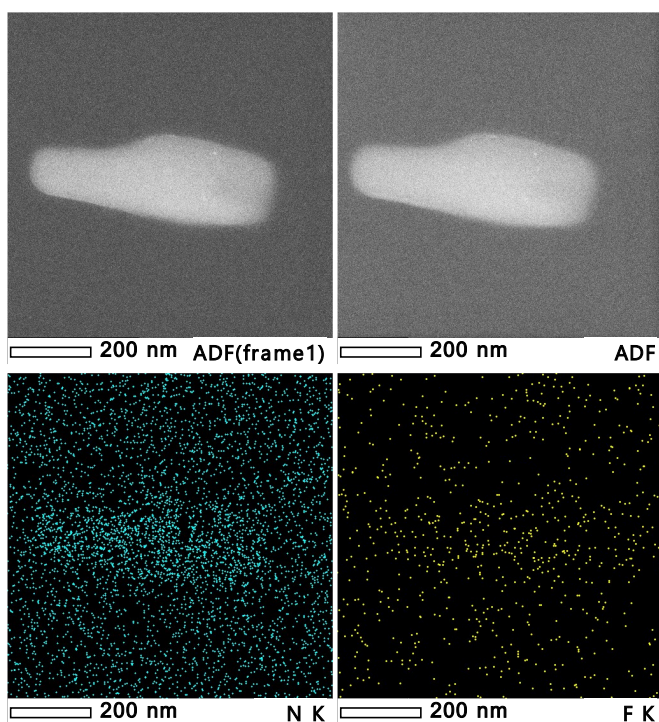

|               |               |
|---------------|---------------|
| Date          | : 3/21/2026   |
| Resolution    | : 512 x 512   |
| -----         |               |
| Instrument    | : JEM-F200 (U |
| Acc. Volt.    | : 200 kV      |
| Magnification | : x 250,000   |
| Dwell Time    | : 0.01 msec.  |
| Sweep Count   | : 42          |

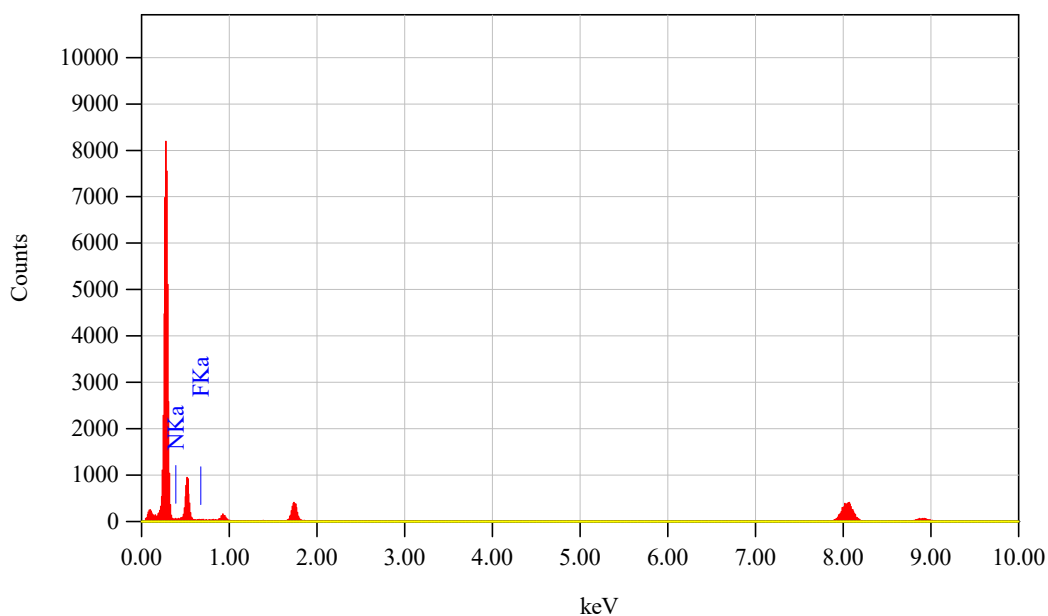

Acquisition Parameter  
 Instrument : JEM-F200 (URP)  
 Acc. Voltage : 200.0 kV  
 Probe Current: 7.47500 nA  
 PHA mode : T4  
 Real Time : 110.03 sec  
 Live Time : 108.05 sec  
 Dead Time : 1 %  
 Counting Rate: 738 cps  
 Energy Range : 0 - 40 keV

Thin Film Standardless Standardless Quantitative Analysis

Fitting Coefficient : 0.9991

| Element    | (keV) | Mass%  | Counts | Sigma | Atom%  | Compound | Mass% | Cation | K      |
|------------|-------|--------|--------|-------|--------|----------|-------|--------|--------|
| N K        |       | ND     |        |       | ND     |          |       |        |        |
| F K (Ref.) | 0.677 | 100.00 | 203.47 | 10.46 | 100.00 |          |       |        | 1.0000 |
| Total      |       | 100.00 |        |       | 100.00 |          |       |        |        |
